# Supplementary material for: Efficient and thermally stable broadband near-infrared emission in a garnet Gd3In2Ga3O12:Cr3+ phosphor
Source: Royal Society of Chemistry journal article supplement (doi:10.1039/d2dt03034a), 2022-01-01
Supplement: d2dt03034a1.pdf [file d2dt03034a1.pdf]

## Supporting Information

### **Efficient and thermally stable broadband near-infrared emission in garnet $\text{Gd}_3\text{In}_2\text{Ga}_3\text{O}_{12}:\text{Cr}^{3+}$ phosphor**

Chaojie Li<sup>a</sup>, Jiyou Zhong<sup>a,\*</sup>, Huan Jiang<sup>a</sup>, and Peng Shi<sup>b,\*</sup>

<sup>a</sup>School of Physics and Optoelectronic Engineering, Guangdong University of Technology, Guangzhou 510006, China. E-mail: zhongjiyou@126.com;

<sup>b</sup>Zhongshan Torch Polytechnic, Zhongshan 528436, China. E-mail: shipeng990205@163.com

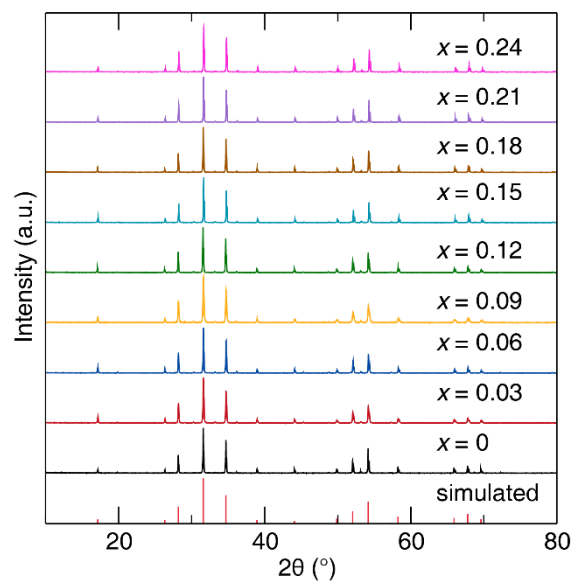

**Fig. S1** Powder XRD patterns of  $\text{Gd}_3\text{In}_{2-x}\text{Cr}_x\text{Ga}_3\text{O}_{12}$  ( $x = 0, 0.03, 0.06, 0.09, 0.12, 0.15, 0.18, 0.21,$  and  $0.24$ ), comparing with the simulated XRD pattern for  $\text{Gd}_3\text{In}_2\text{Ga}_3\text{O}_{12}$ .

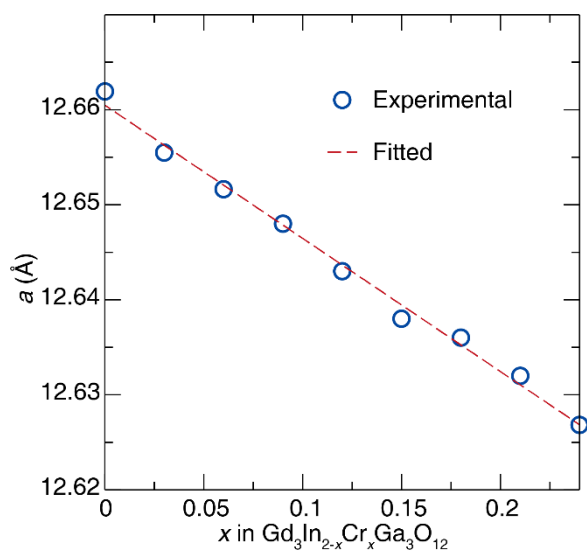

**Fig. S2** Refined lattice parameter ( $a=b=c$ ) of  $\text{Gd}_3\text{In}_{2-x}\text{Cr}_x\text{Ga}_3\text{O}_{12}$  ( $x = 0, 0.03, 0.06, 0.09, 0.12, 0.15,$   $0.18, 0.21,$  and  $0.24$ ).

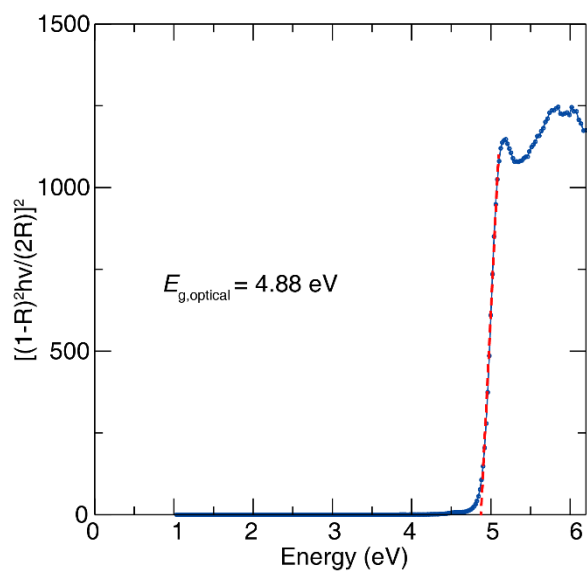

**Fig. S3** The calculated optical band gap of  $\text{Gd}_3\text{In}_2\text{Ga}_3\text{O}_{12}$ .

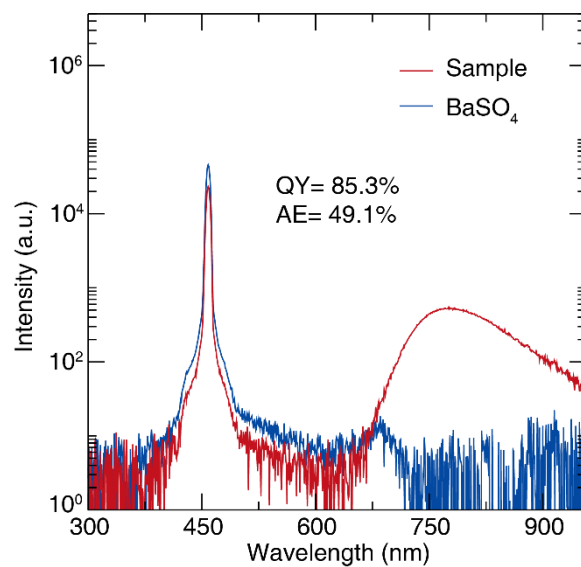

**Fig. S4** PLQY of  $\text{Gd}_3\text{In}_{1.82}\text{Cr}_{0.18}\text{Ga}_3\text{O}_{12}$  phosphor under 460 nm excitation.

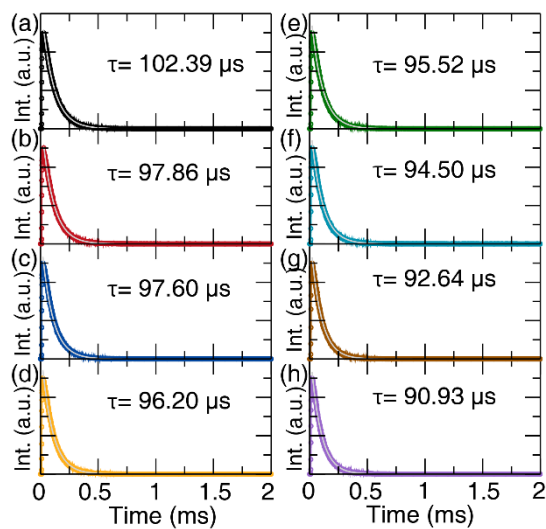

**Fig. S5** (a-h) Decay curves of  $\text{Gd}_3\text{In}_{2-x}\text{Cr}_x\text{Ga}_3\text{O}_{12}$  ( $x = 0, 0.03, 0.06, 0.09, 0.12, 0.15, 0.18, 0.21,$  and  $0.24$ ) fitted by single-exponential function. The colored line is the original data, while the white line is the fitting curve.

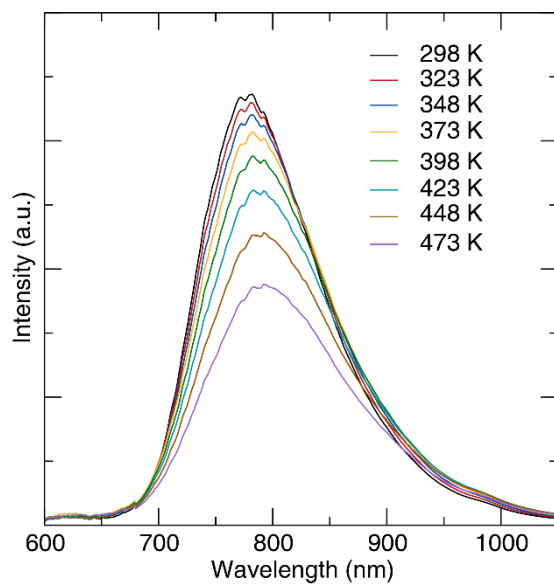

**Fig. S6** Temperature-dependent emission spectra of  $\text{Gd}_3\text{In}_{1.82}\text{Cr}_{0.18}\text{Ga}_3\text{O}_{12}$  phosphor excited by 460 nm in temperature range of 298 to 473 K.

**Table S1** The refined atomic positions.

| atom  | Wyck. position | occ. | x         | y         | z         |
|-------|----------------|------|-----------|-----------|-----------|
| Gd(1) | 24c            | 1    | 1/8       | 0         | 1/4       |
| In(1) | 16a            | 1    | 0         | 0         | 0         |
| Ga(1) | 24d            | 1    | 3/8       | 0         | 1/4       |
| O(1)  | 96h            | 1    | 0.0965(6) | 0.1873(0) | 0.2845(6) |

**Table S2** The detailed input and output parameters for this NIR pc-LED device.

| Current (mA) | Total input power (mW) | Total output power (mW) | Blue light output power (mW) | NIR output power (mW) | NIR photoelectric efficiency (%) |
|--------------|------------------------|-------------------------|------------------------------|-----------------------|----------------------------------|
| 25           | 65.88                  | 10.75                   | 1.65                         | 9.10                  | 13.82                            |
| 50           | 134.90                 | 20.99                   | 3.26                         | 13.73                 | 13.14                            |
| 75           | 206.40                 | 30.81                   | 4.86                         | 25.95                 | 12.57                            |
| 100          | 280.20                 | 40.04                   | 6.35                         | 33.69                 | 12.02                            |
| 125          | 356.00                 | 48.37                   | 7.69                         | 40.68                 | 11.43                            |
| 150          | 433.90                 | 56.98                   | 9.13                         | 47.85                 | 11.03                            |
| 175          | 513.3                  | 64.03                   | 10.23                        | 53.80                 | 10.48                            |
| 200          | 594.7                  | 71.01                   | 11.38                        | 59.63                 | 10.03                            |
| 225          | 678.3                  | 78.92                   | 12.79                        | 66.13                 | 9.75                             |
| 250          | 762.9                  | 83.86                   | 13.53                        | 70.33                 | 9.22                             |
| 275          | 849.6                  | 89.29                   | 14.42                        | 74.87                 | 8.81                             |
| 300          | 637.8                  | 94.18                   | 15.26                        | 78.92                 | 8.42                             |
| 325          | 1028.00                | 98.56                   | 16.00                        | 82.56                 | 8.03                             |
| 350          | 1119.00                | 102.40                  | 16.69                        | 85.71                 | 7.66                             |
